# Supplementary material
Source: Springer Nature journal article supplement (https://www.springermedizin.de/resource/supplementary/12913_2008_923_MOESM1_ESM.pdf/9536460)

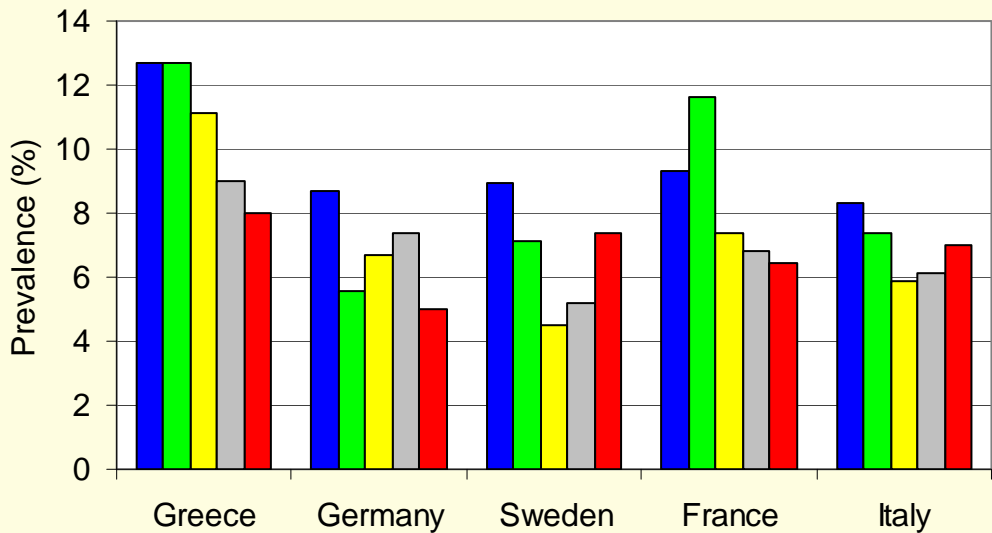

■ Income 1 (low) ■ Income 2 ■ Income 3 ■ Income 4 ■ Income 5 (high)

Supplement: MOESM1 [file 9536460]
